# Supplementary material for: Laricitrin 3-Rutinoside from Ginkgo biloba Fruits Prevents Damage in TNF-α-Stimulated Normal Human Dermal Fibroblasts
Source: MDPI journal article supplement (doi:10.3390/antiox12071432), 2023-07-15
Supplement: s1 [file s1]

## Supplementary Material

### Laricitrin 3-Rutinoside from *Ginkgo biloba* Fruits Protects Damage in TNF- $\alpha$ -Stimulated Normal Human Dermal Fibroblasts

Sullim Lee <sup>1,†</sup>, Yea Jung Choi <sup>2,†</sup>, Chen Huo <sup>3,†</sup>, Akida Alishir <sup>3</sup>, Ki Sung Kang <sup>2</sup>, Il-Ho Park <sup>4</sup>, Taesu Jang <sup>5,\*</sup> and Ki Hyun Kim <sup>3,\*</sup>

<sup>1</sup> Department of Life Science, College of Bio-Nano Technology, Gachon University, Seongnam 13120, Republic of Korea; sullimlee@gachon.ac.kr (S.L.)

<sup>2</sup> College of Korean Medicine, Gachon University, Seongnam 13120, Republic of Korea; domdada22@gachon.ac.kr (Y.J.C.); kkang@gachon.ac.kr (K.S.K.)

<sup>3</sup> School of Pharmacy, Sungkyunkwan University, Suwon 16419, Republic of Korea; huochen\_0213@163.com (C.H.); akida.alishir@gmail.com (A.A.)

<sup>4</sup> College of Pharmacy, Sahmyook University, 815, Hwarang-ro, Nowon-gu, Seoul 01795, Republic of Korea; parkilho@syu.ac.kr (I.H.P.)

<sup>5</sup> Health Administration, Dankook University, Cheonan 31116, Republic of Korea; jangts@dankook.ac.kr (T.J.)

\* Correspondence: jangts@dankook.ac.kr (T.J.); khkim83@skku.edu (K.H.K.); Tel.: +82-41-550-1476 (T.J.); +82-31-290-7700 (K.H.K.)

<sup>†</sup> These authors contributed equally to this work.

|                                                                                                                                                                   |    |
|-------------------------------------------------------------------------------------------------------------------------------------------------------------------|----|
| <b>Figure S1.</b> $^1\text{H}$ -NMR ( $\text{CD}_3\text{OD}$ , 850 MHz) spectrum of ( <i>E</i> )-coniferin (1).....                                               | 4  |
| <b>Figure S2.</b> UV chromatogram of LC/MS (A: monitored at 254 nm) and UV (B) and MS data (C: positive; D: negative) for 1. ....                                 | 5  |
| <b>Figure S3.</b> $^1\text{H}$ -NMR ( $\text{CD}_3\text{OD}$ , 850 MHz) spectrum of syringin (2). ....                                                            | 6  |
| <b>Figure S4.</b> UV chromatogram of LC/MS (A: monitored at 254 nm) and UV (B) and MS data (C: positive; D: negative) for 2. ....                                 | 7  |
| <b>Figure S5</b> $^1\text{H}$ -NMR ( $\text{CD}_3\text{OD}$ , 850 MHz) spectrum of 4-hydroxybenzoic acid 4- <i>O</i> - $\beta$ -D-glucopyranoside (3). ....       | 8  |
| <b>Figure S6.</b> UV chromatogram of LC/MS (A: monitored at 254 nm) and UV (B) and MS data (C: positive; D: negative) for 3. ....                                 | 9  |
| <b>Figure S7.</b> $^1\text{H}$ -NMR ( $\text{CD}_3\text{OD}$ , 850 MHz) spectrum of vanillic acid 4- <i>O</i> - $\beta$ -D-glucopyranoside (4). ....              | 10 |
| <b>Figure S8.</b> UV chromatogram of LC/MS (A: monitored at 315 nm) and UV (B) and MS data (C: positive; D: negative) for 4. ....                                 | 11 |
| <b>Figure S9.</b> $^1\text{H}$ -NMR ( $\text{CD}_3\text{OD}$ , 850 MHz) spectrum of glucosyringic acid (5). ....                                                  | 12 |
| <b>Figure S10.</b> UV chromatogram of LC/MS (A: monitored at 315 nm) and UV (B) and MS data (C: positive; D: negative) for 5. ....                                | 13 |
| <b>Figure S11.</b> $^1\text{H}$ -NMR ( $\text{CD}_3\text{OD}$ , 850 MHz) spectrum of ( <i>E</i> )-ferulic acid 4- <i>O</i> - $\beta$ -D-glucoside (6). ....       | 14 |
| <b>Figure S12.</b> UV chromatogram of LC/MS (A: monitored at 315 nm) and UV (B) and MS data (C: positive; D: negative) for 6. ....                                | 15 |
| <b>Figure S13.</b> $^1\text{H}$ -NMR ( $\text{CD}_3\text{OD}$ , 850 MHz) spectrum of ( <i>E</i> )-sinapic acid 4- <i>O</i> - $\beta$ -D-glucopyranoside (7). .... | 16 |
| <b>Figure S14.</b> UV chromatogram of LC/MS (A: monitored at 315 nm) and UV (B) and MS data (C: positive; D: negative) for 7. ....                                | 17 |
| <b>Figure S15.</b> $^1\text{H}$ -NMR ( $\text{CD}_3\text{OD}$ , 850 MHz) spectrum of ginkgotoxin-5-glucoside (8). ....                                            | 18 |
| <b>Figure S16.</b> UV chromatogram of LC/MS (A: monitored at 315 nm) and UV (B) and MS data (C: positive; D: negative) for 8. ....                                | 19 |
| <b>Figure S17.</b> $^1\text{H}$ -NMR ( $\text{CD}_3\text{OD}$ , 850 MHz) spectrum of ginkgopanoside (9). ....                                                     | 20 |
| <b>Figure S18.</b> UV chromatogram of LC/MS (A: monitored at 254 nm) and UV (B) and MS data (C: positive; D: negative) for 9. ....                                | 21 |

|                                                                                                                                                                                                                                   |    |
|-----------------------------------------------------------------------------------------------------------------------------------------------------------------------------------------------------------------------------------|----|
| <b>Figure S19.</b> <sup>1</sup> H-NMR (CD <sub>3</sub> OD, 850 MHz) spectrum of (Z)-4-coumaric acid 4-O-β-D-glucopyranoside ( <b>10</b> ). .....                                                                                  | 22 |
| <b>Figure S20.</b> UV chromatogram of LC/MS (A: monitored at 254 nm) and UV (B) and MS data (C: positive; D: negative) for <b>10</b> . .....                                                                                      | 23 |
| <b>Figure S21.</b> <sup>1</sup> H-NMR (CD <sub>3</sub> OD, 850 MHz) spectrum of (1' <i>R</i> ,2' <i>S</i> ,5' <i>R</i> ,8' <i>S</i> ,2' <i>Z</i> ,4' <i>E</i> )-dihydrophaseic acid 3'-O-β-D-glucopyranoside ( <b>11</b> ). ..... | 24 |
| <b>Figure S22.</b> UV chromatogram of LC/MS (A: monitored at 254 nm) and UV (B) and MS data (C: positive; D: negative) for <b>11</b> . .....                                                                                      | 25 |
| <b>Figure S23.</b> <sup>1</sup> H-NMR (CD <sub>3</sub> OD, 850 MHz) spectrum of eucomic acid ( <b>12</b> ). .....                                                                                                                 | 26 |
| <b>Figure S24.</b> UV chromatogram of LC/MS (A: monitored at 254 nm) and UV (B) and MS data (C: positive; D: negative) for <b>12</b> . .....                                                                                      | 27 |
| <b>Figure S25.</b> <sup>1</sup> H-NMR (CD <sub>3</sub> OD, 850 MHz) spectrum of rutin ( <b>13</b> ). .....                                                                                                                        | 28 |
| <b>Figure S26.</b> UV chromatogram of LC/MS (A: monitored at 254 nm) and UV (B) and MS data (C: positive; D: negative) for <b>13</b> . .....                                                                                      | 29 |
| <b>Figure S27.</b> <sup>1</sup> H-NMR (CD <sub>3</sub> OD, 850 MHz) spectrum of laricitrin 3-rutinoside ( <b>14</b> ). ..                                                                                                         | 30 |
| <b>Figure S28.</b> UV chromatogram of LC/MS (A: monitored at 254 nm) and UV (B) and MS data (C: positive; D: negative) for <b>14</b> . .....                                                                                      | 31 |
| <b>Figure S29.</b> Effect of the extract on NHDF viability .....                                                                                                                                                                  | 32 |
| <b>Figure S30.</b> Effects of the extract on TNF-α-induced intercellular reactive oxygen species (ROS) generation .....                                                                                                           | 33 |
| <b>Figure S31.</b> Effect of the extract on MMP-1 and COL1A1 protein expression in tumor necrosis factor-α (TNF-α)-stimulated normal human dermal fibroblasts (NHDFs) .....                                                       | 34 |

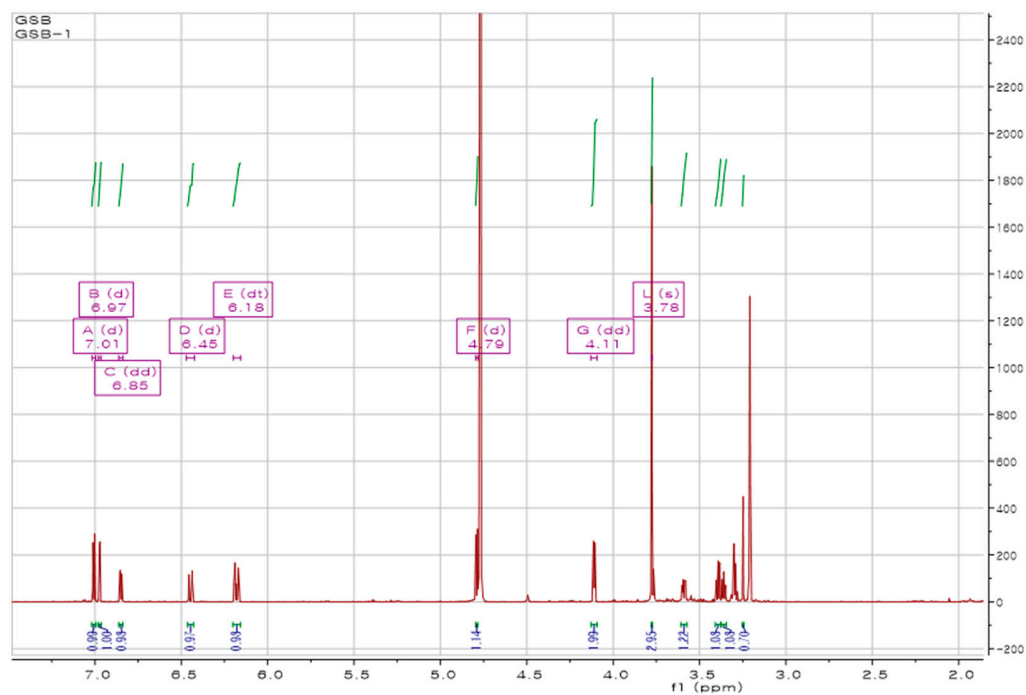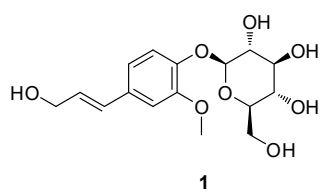

**Figure S1.**  $^1\text{H}$ -NMR ( $\text{CD}_3\text{OD}$ , 850 MHz) spectrum of (*E*)-coniferin (**1**).

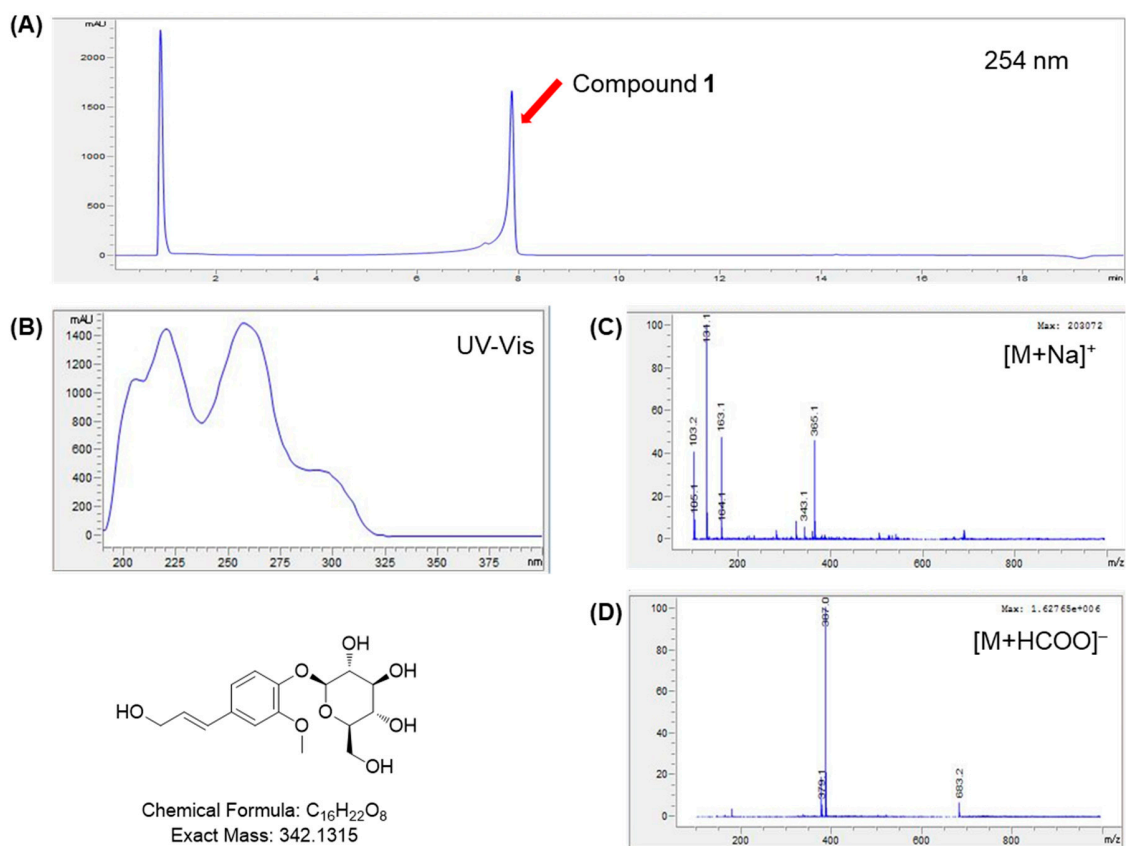

**Figure S2.** UV chromatogram of LC/MS (A: monitored at 254 nm) and UV (B) and MS data (C: positive; D: negative) for **1**.

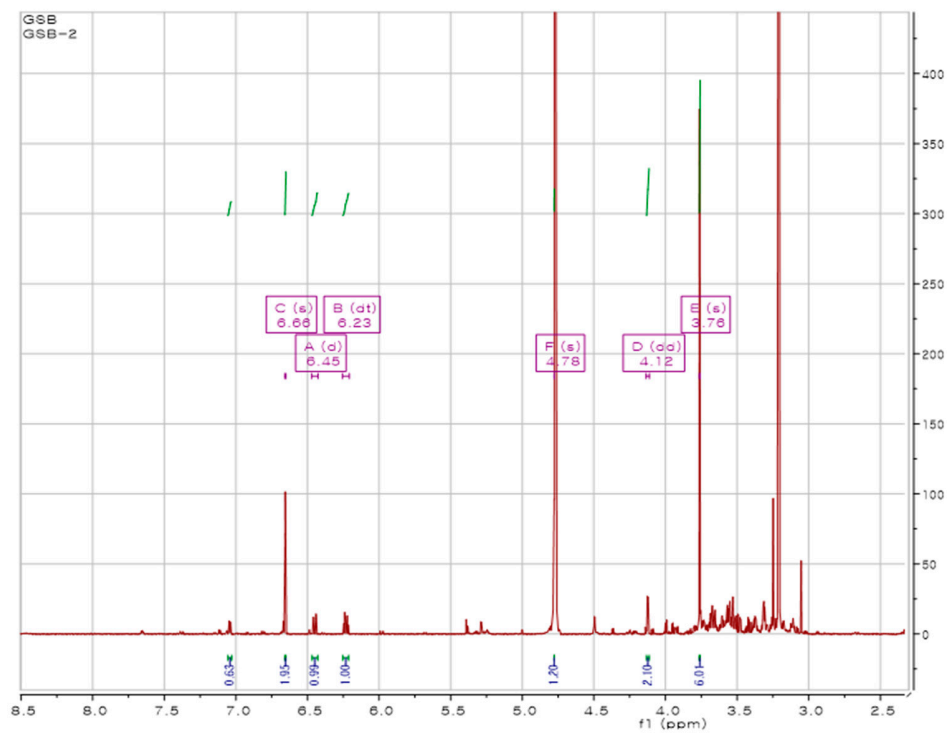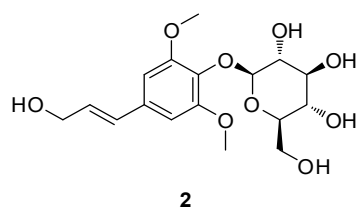

**Figure S3.**  $^1\text{H}$ -NMR ( $\text{CD}_3\text{OD}$ , 850 MHz) spectrum of syringin (**2**).

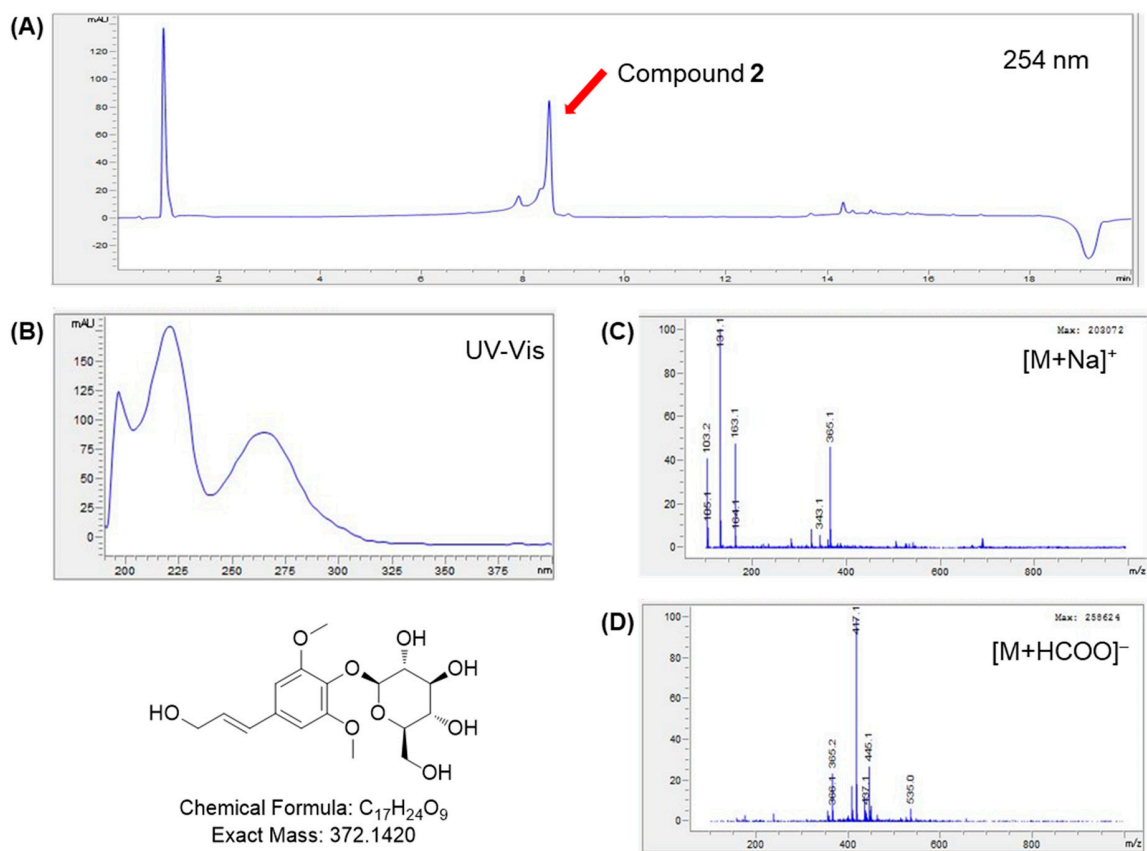

**Figure S4.** UV chromatogram of LC/MS (A: monitored at 254 nm) and UV (B) and MS data (C: positive; D: negative) for 2.

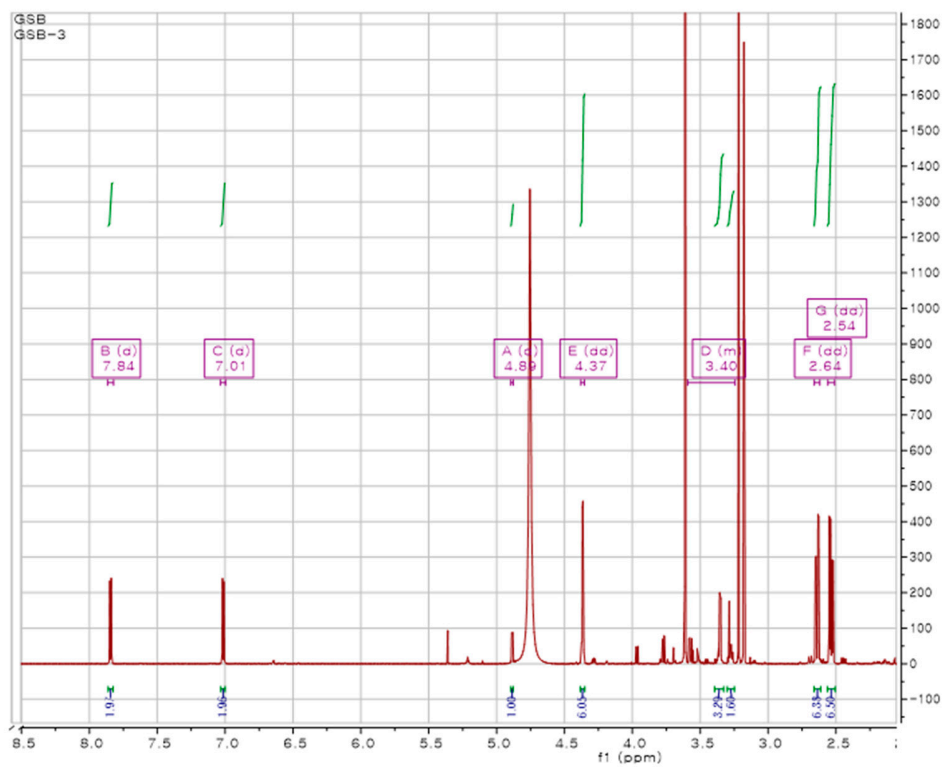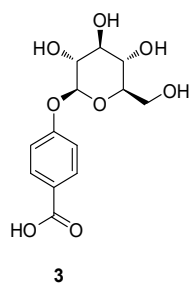

**Figure S5**  $^1\text{H}$ -NMR ( $\text{CD}_3\text{OD}$ , 850 MHz) spectrum of 4-hydroxybenzoic acid 4- $O$ - $\beta$ -D-glucopyranoside (**3**).



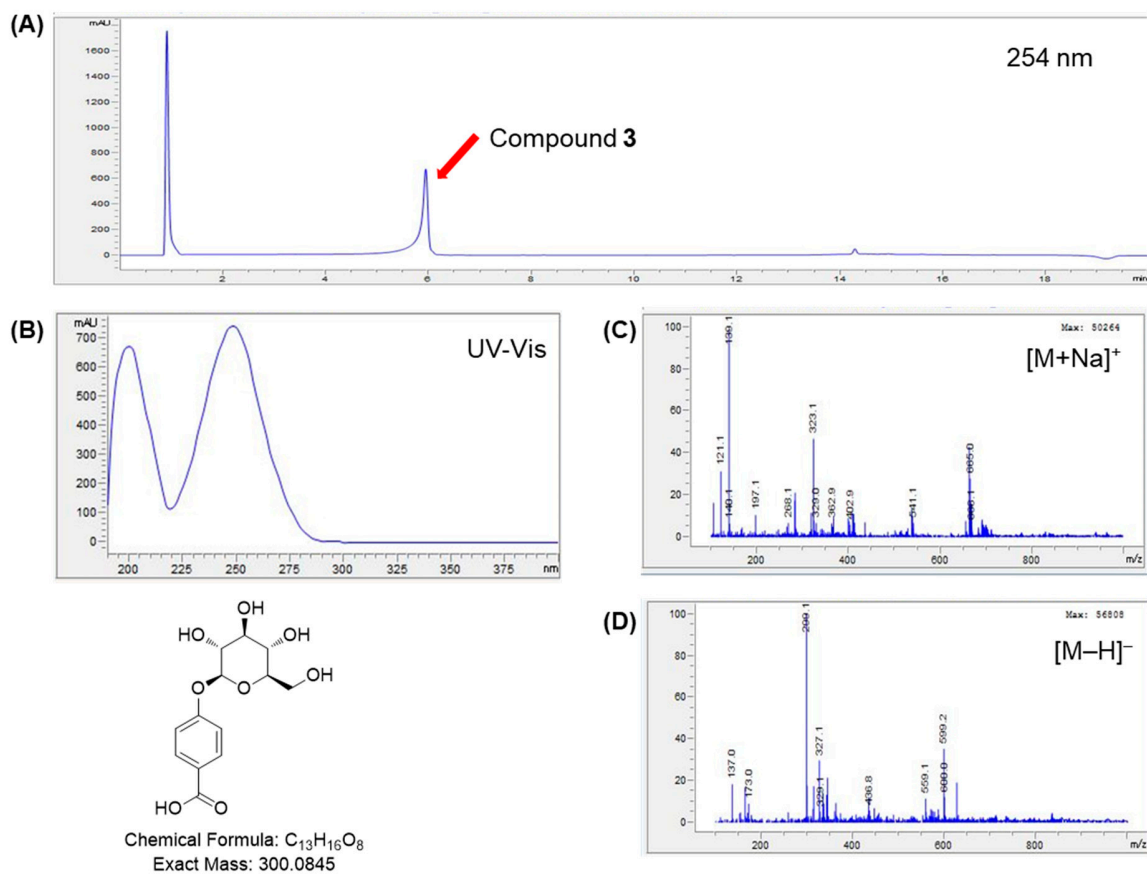

**Figure S6.** UV chromatogram of LC/MS (A: monitored at 254 nm) and UV (B) and MS data (C: positive; D: negative) for 3.

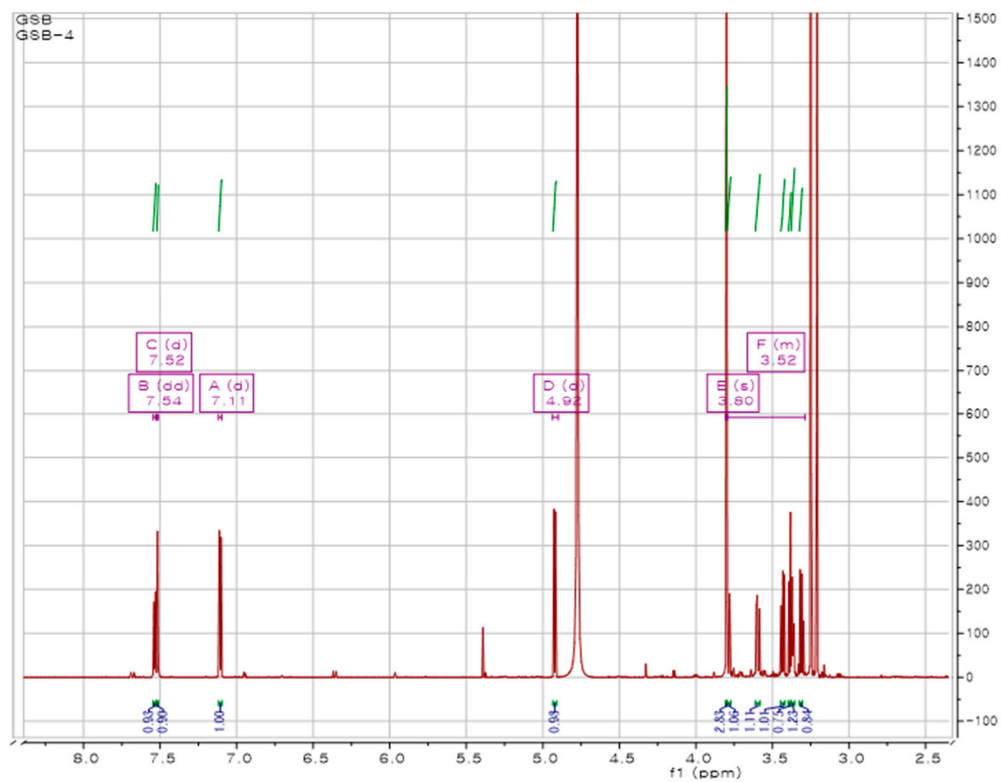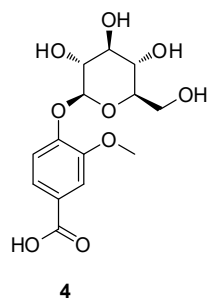

**Figure S7.**  $^1\text{H}$ -NMR ( $\text{CD}_3\text{OD}$ , 850 MHz) spectrum of vanillic acid 4- $\text{O}$ - $\beta$ -D-glucopyranoside (**4**).

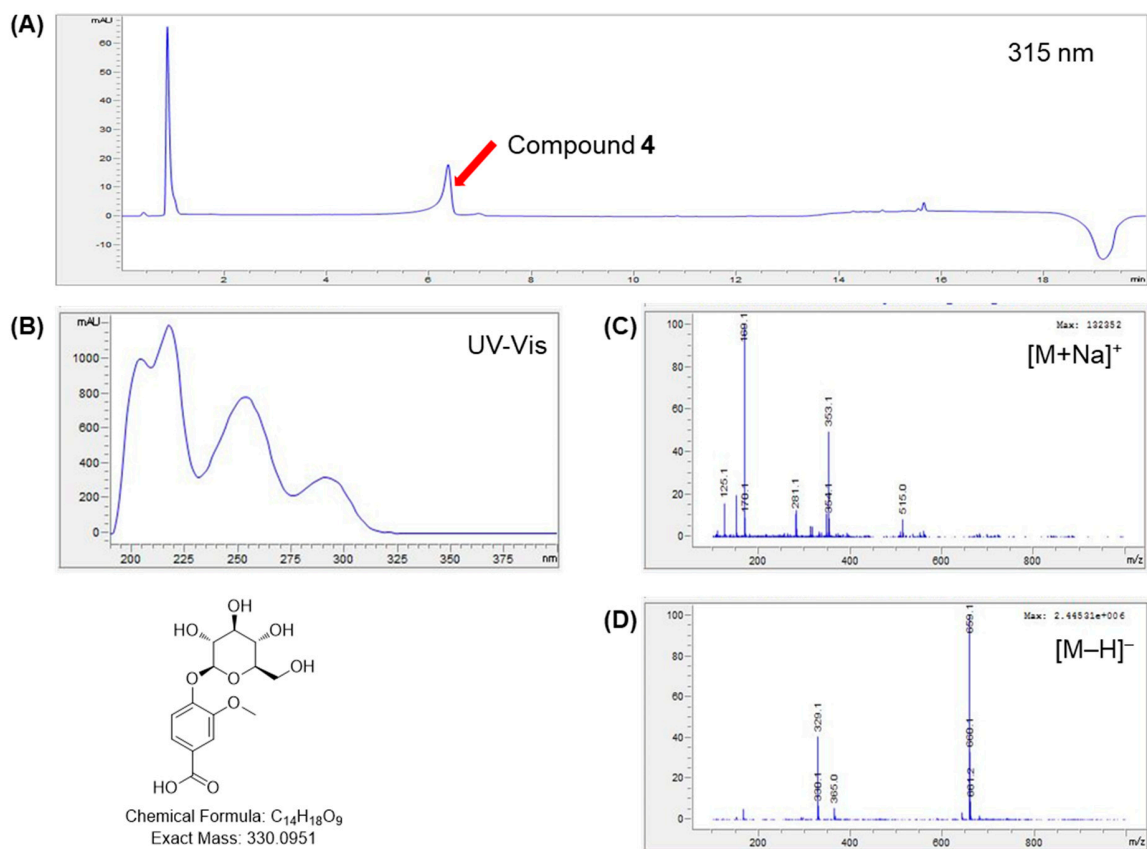

**Figure S8.** UV chromatogram of LC/MS (A: monitored at 315 nm) and UV (B) and MS data (C: positive; D: negative) for **4**.

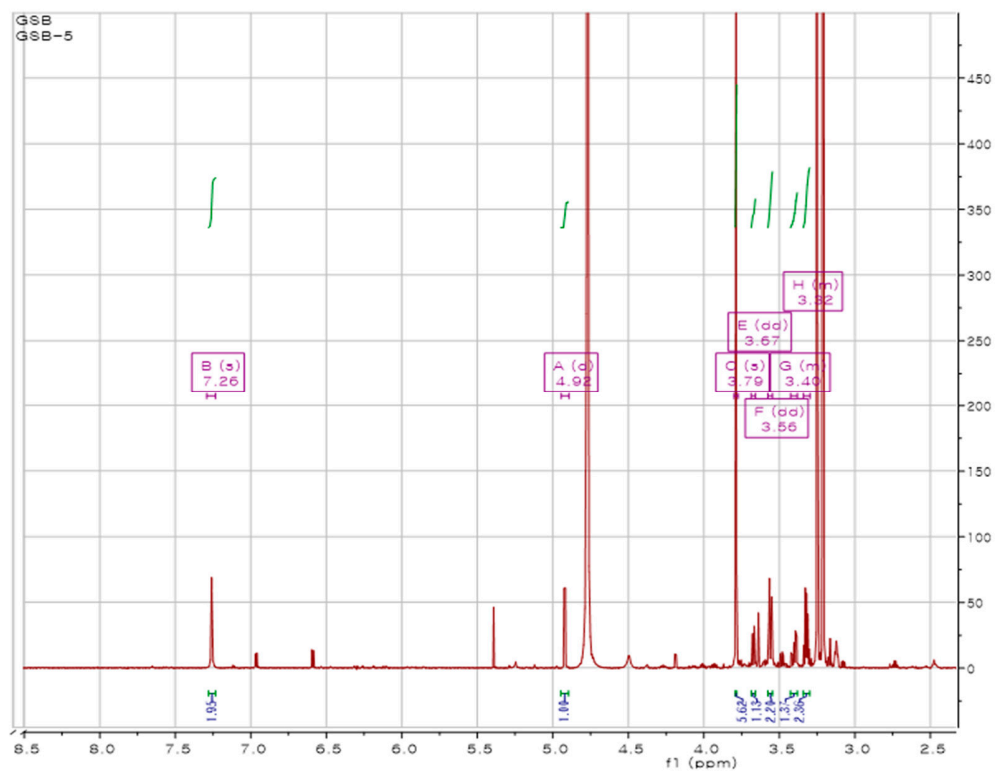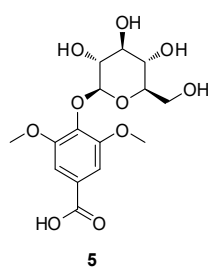

**Figure S9.**  $^1\text{H}$ -NMR ( $\text{CD}_3\text{OD}$ , 850 MHz) spectrum of glucosyringic acid (**5**).

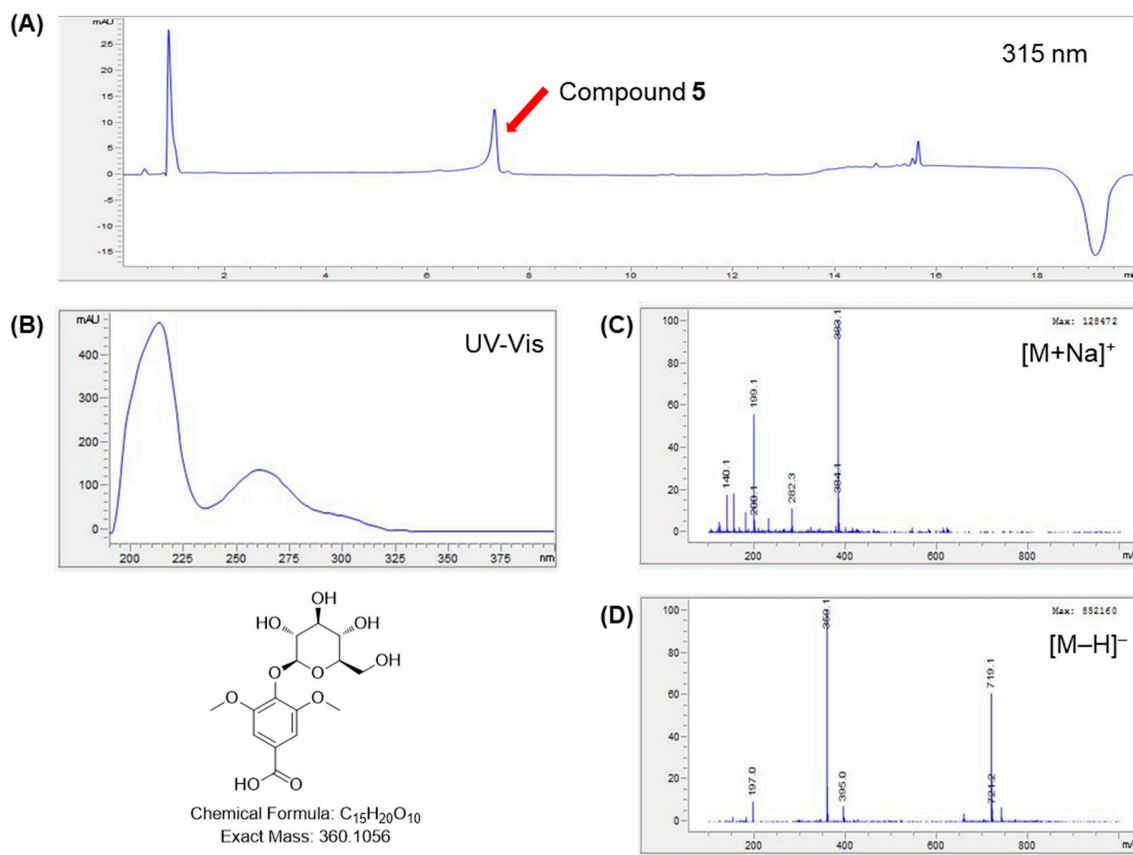

**Figure S10.** UV chromatogram of LC/MS (A: monitored at 315 nm) and UV (B) and MS data (C: positive; D: negative) for **5**.

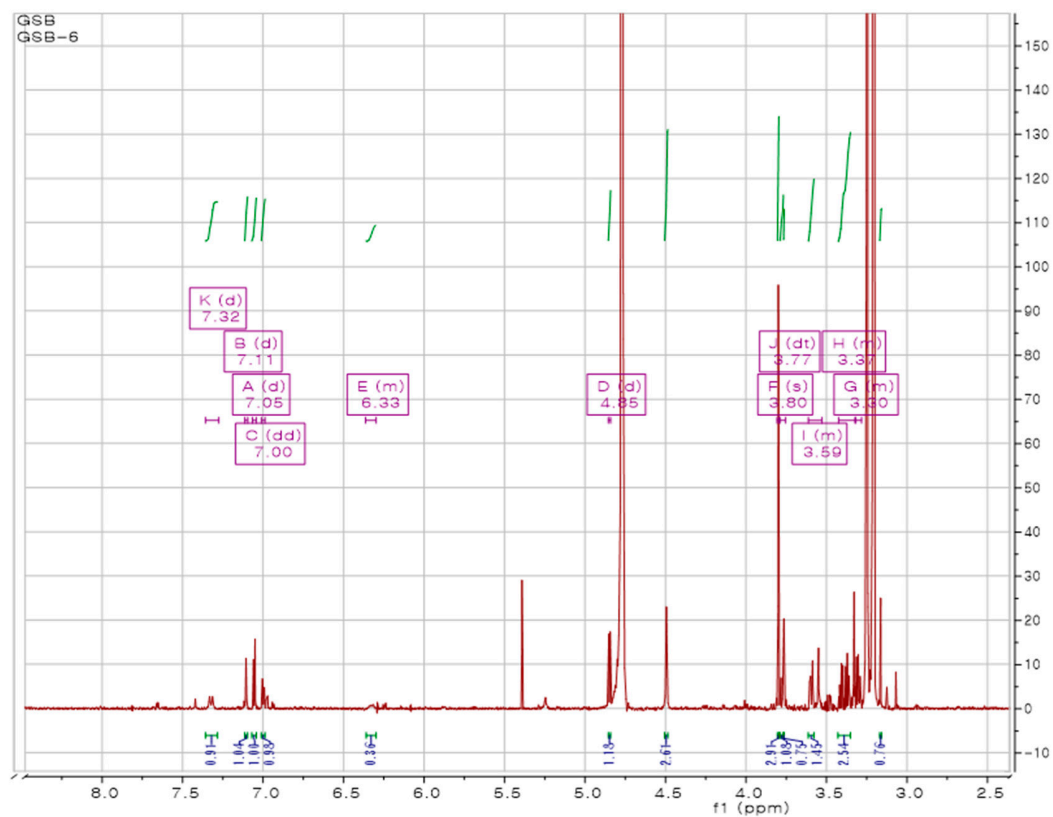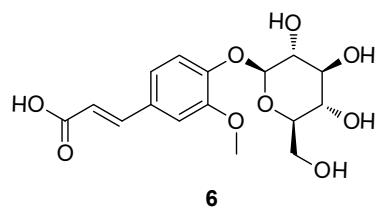

**Figure S11.**  $^1\text{H}$ -NMR ( $\text{CD}_3\text{OD}$ , 850 MHz) spectrum of (*E*)-ferulic acid 4-*O*- $\beta$ -D-glucoside (**6**).

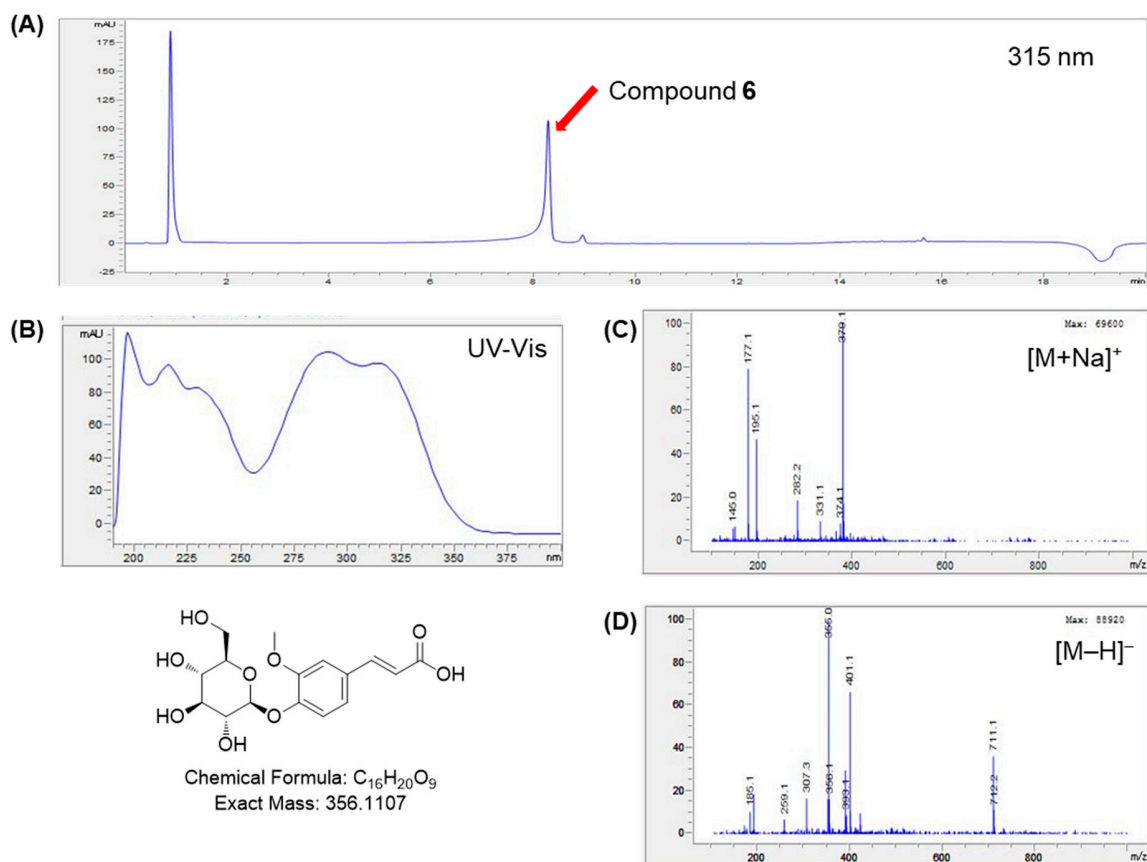

**Figure S12.** UV chromatogram of LC/MS (A: monitored at 315 nm) and UV (B) and MS data (C: positive; D: negative) for **6**.

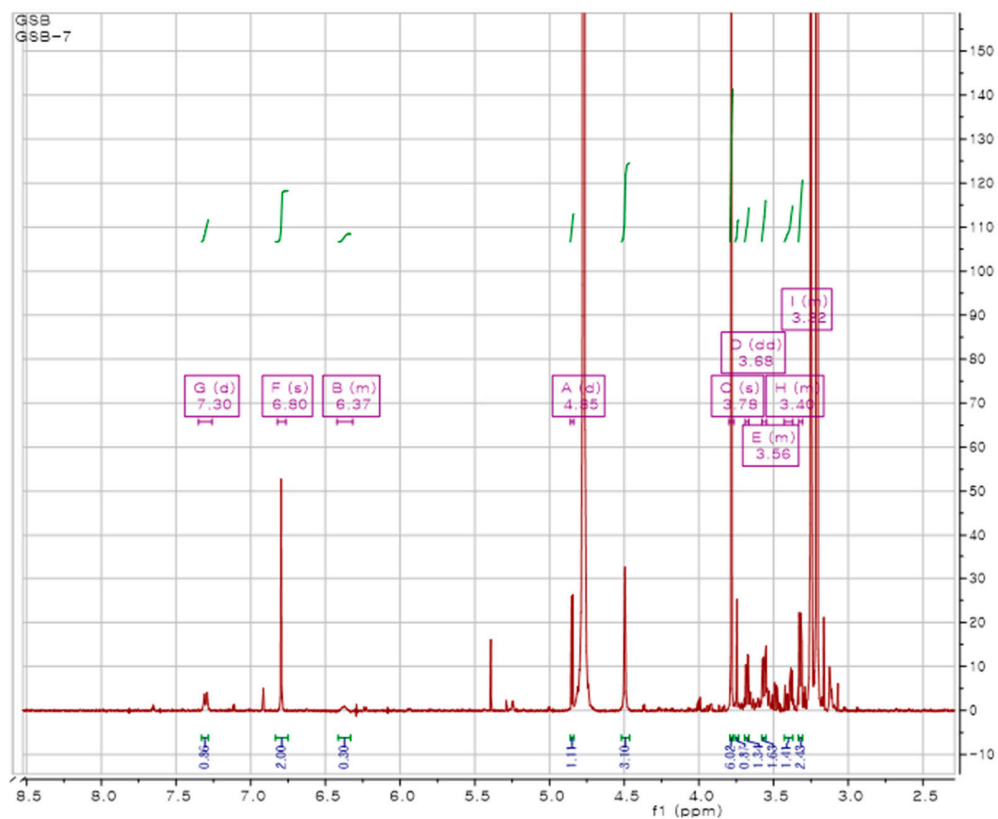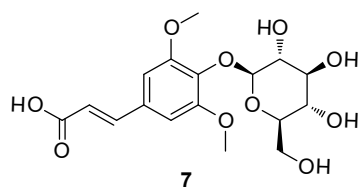

**Figure S13.**  $^1\text{H}$ -NMR ( $\text{CD}_3\text{OD}$ , 850 MHz) spectrum of (*E*)-sinapic acid 4- $\text{O}$ - $\beta$ -D-glucopyranoside (**7**).



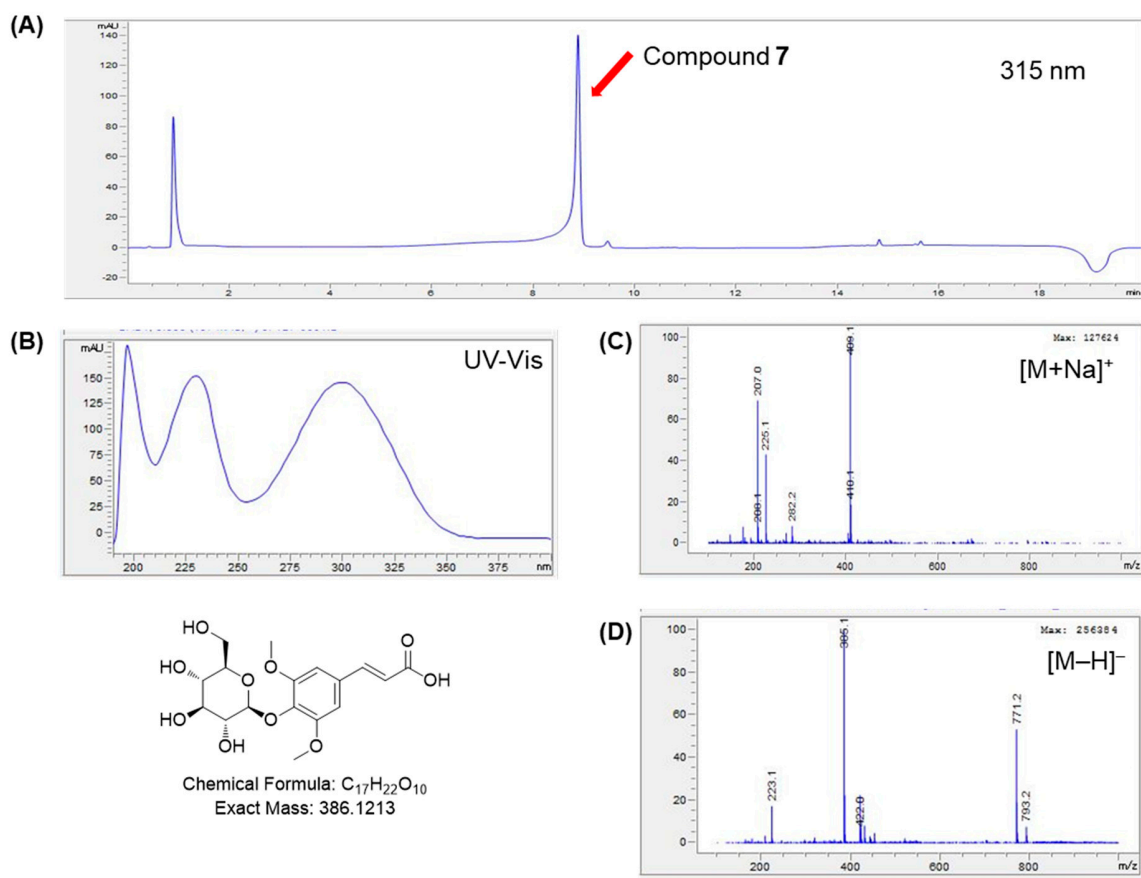

**Figure S14.** UV chromatogram of LC/MS (A: monitored at 315 nm) and UV (B) and MS data (C: positive; D: negative) for 7.

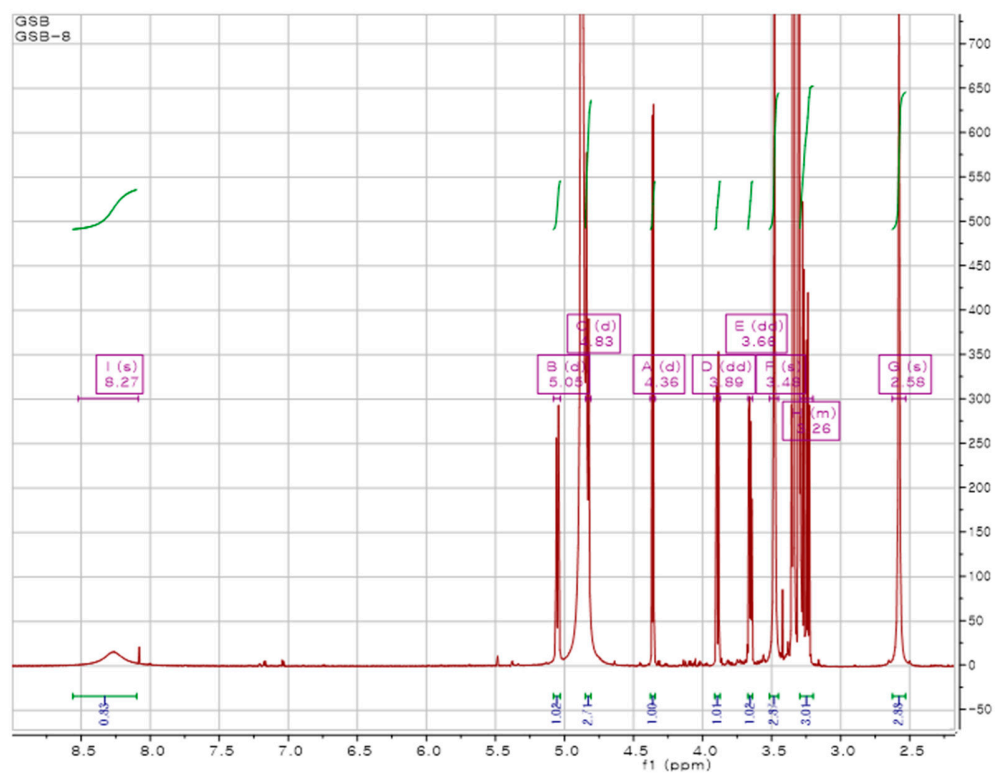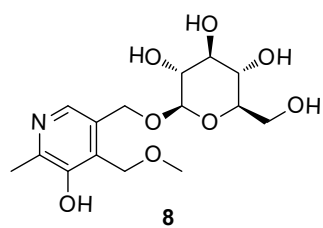

**Figure S15.**  $^1\text{H}$ -NMR ( $\text{CD}_3\text{OD}$ , 850 MHz) spectrum of ginkgotoxin-5-glucoside (**8**).

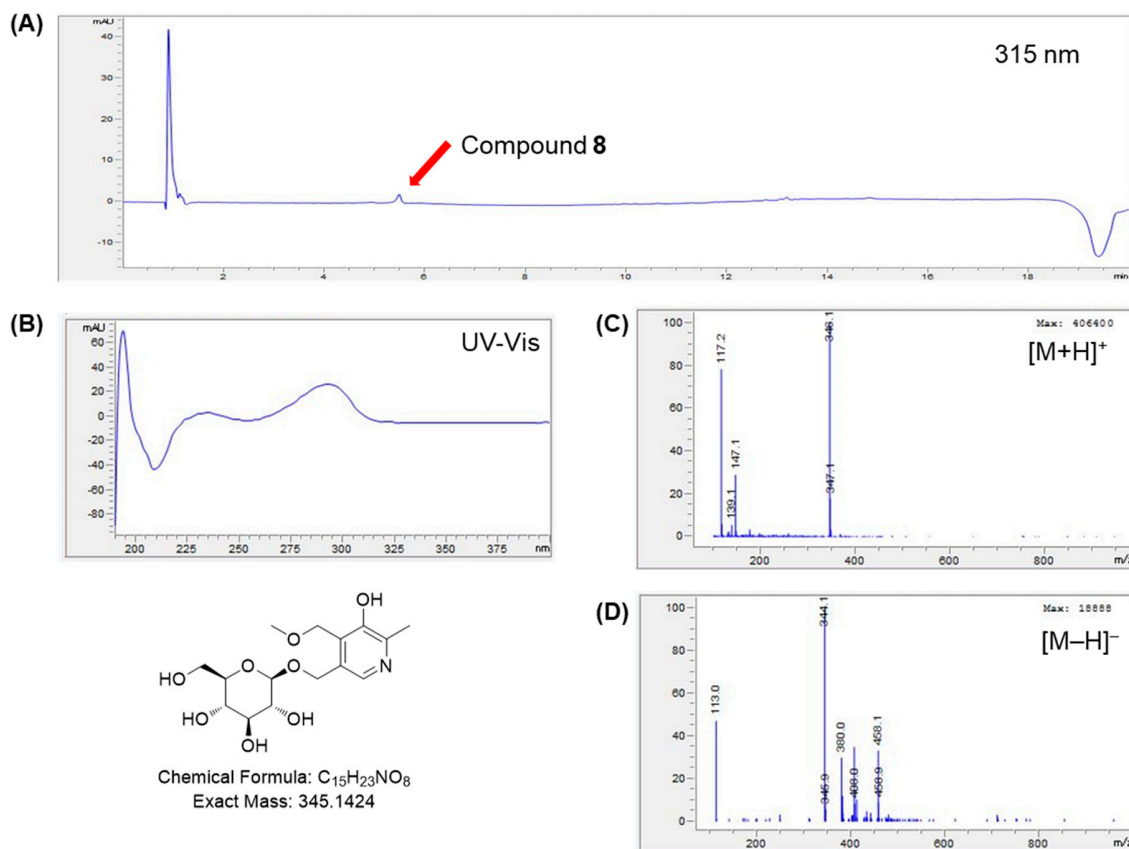

**Figure S16.** UV chromatogram of LC/MS (A: monitored at 315 nm) and UV (B) and MS data (C: positive; D: negative) for 8.

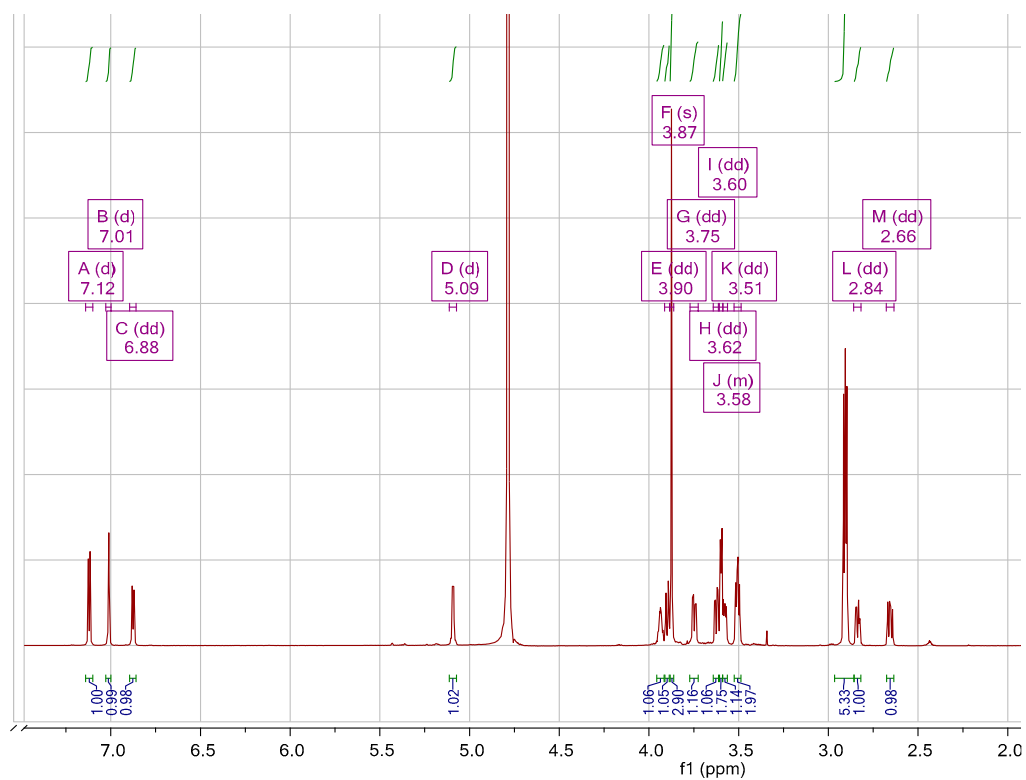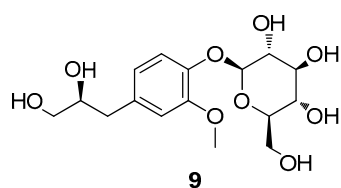

**Figure S17.**  $^1\text{H}$ -NMR ( $\text{CD}_3\text{OD}$ , 850 MHz) spectrum of ginkgopanoside (**9**).

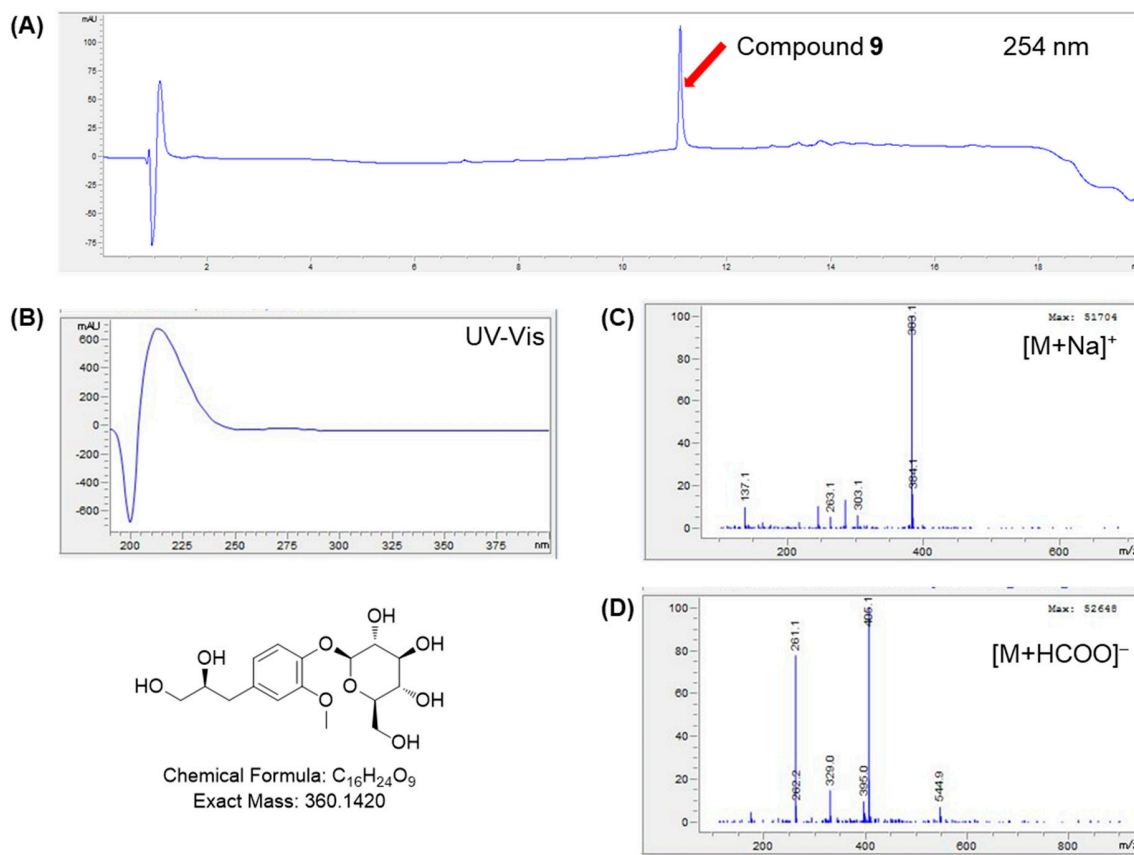

**Figure S18.** UV chromatogram of LC/MS (A: monitored at 254 nm) and UV (B) and MS data (C: positive; D: negative) for **9**.

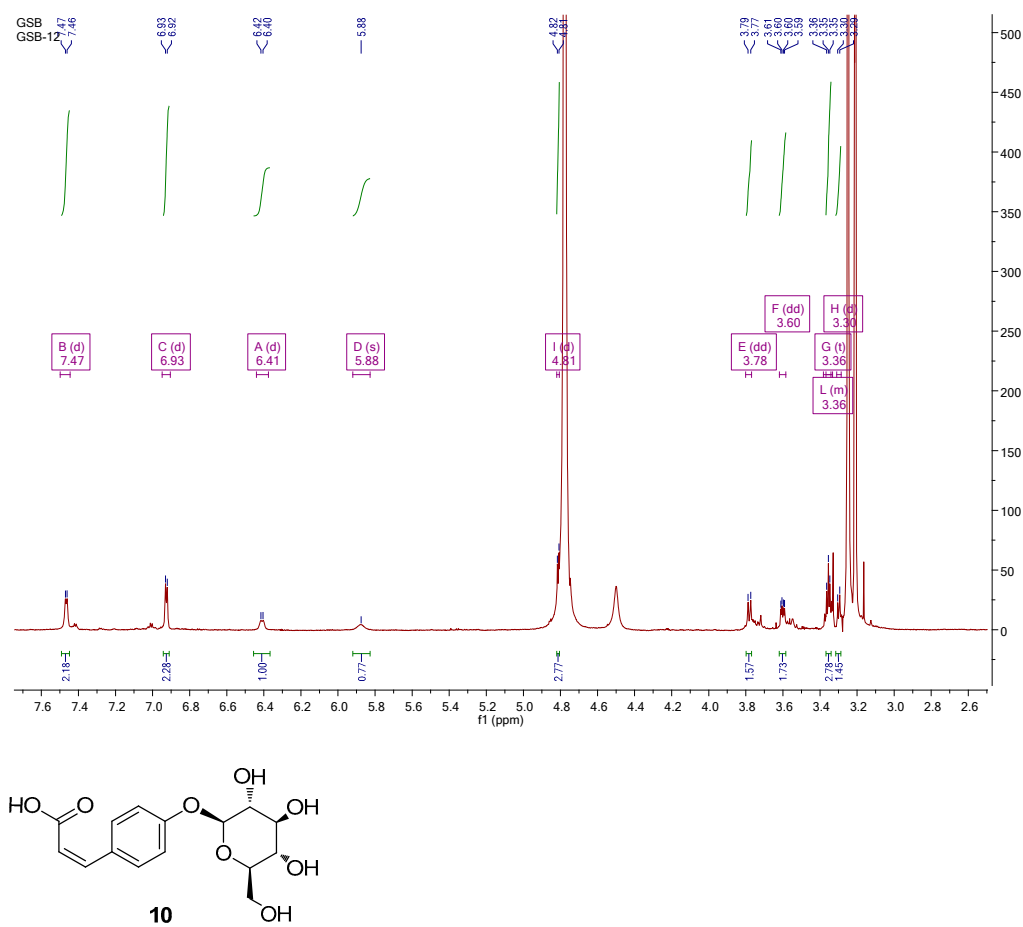

**Figure S19.** <sup>1</sup>H-NMR (CD<sub>3</sub>OD, 850 MHz) spectrum of (Z)-4-coumaric acid 4-O-β-D-glucopyranoside (**10**).

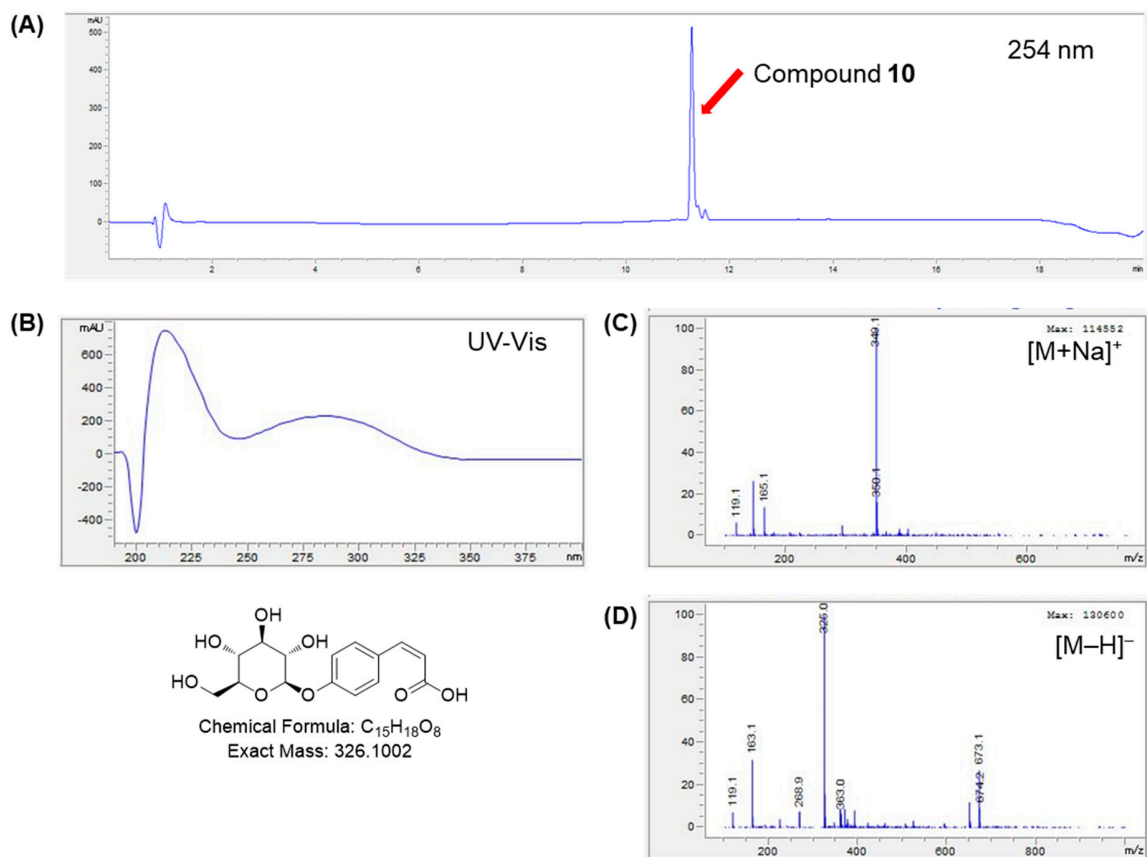

**Figure S20.** UV chromatogram of LC/MS (A: monitored at 254 nm) and UV (B) and MS data (C: positive; D: negative) for **10**.

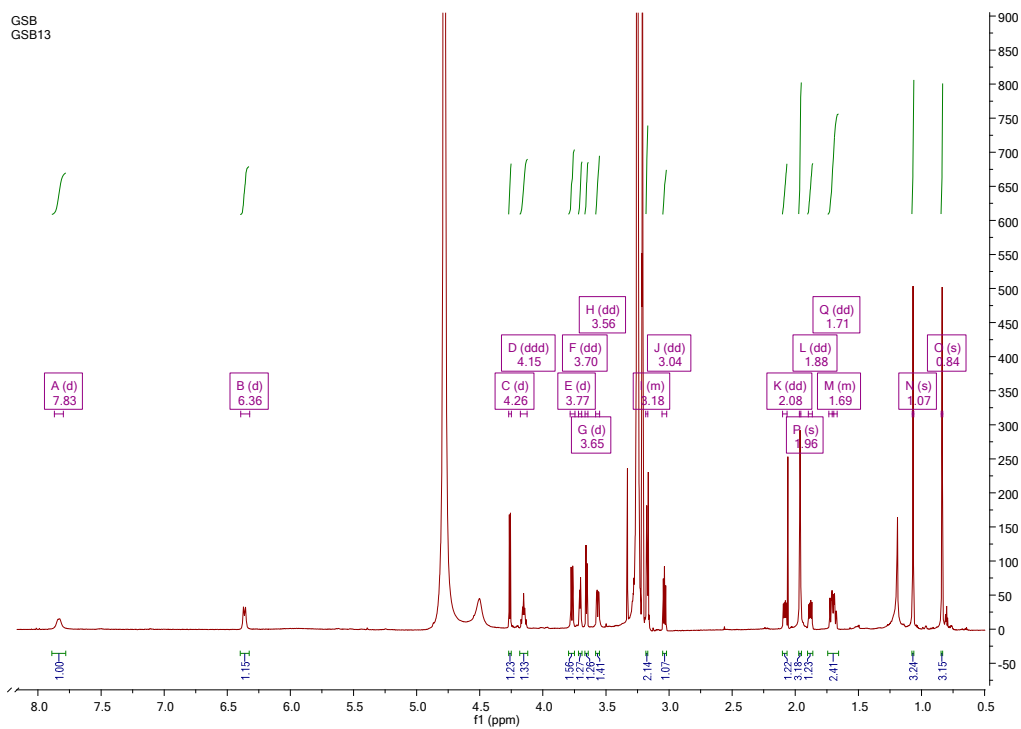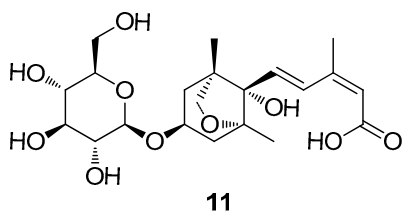

**Figure S21.**  $^1\text{H}$ -NMR ( $\text{CD}_3\text{OD}$ , 850 MHz) spectrum of (1'*R*,2'*S*,5'*R*,8'*S*,2'*Z*,4'*E*)-dihydrophaseic acid 3'-*O*- $\beta$ -D-glucopyranoside (**11**).



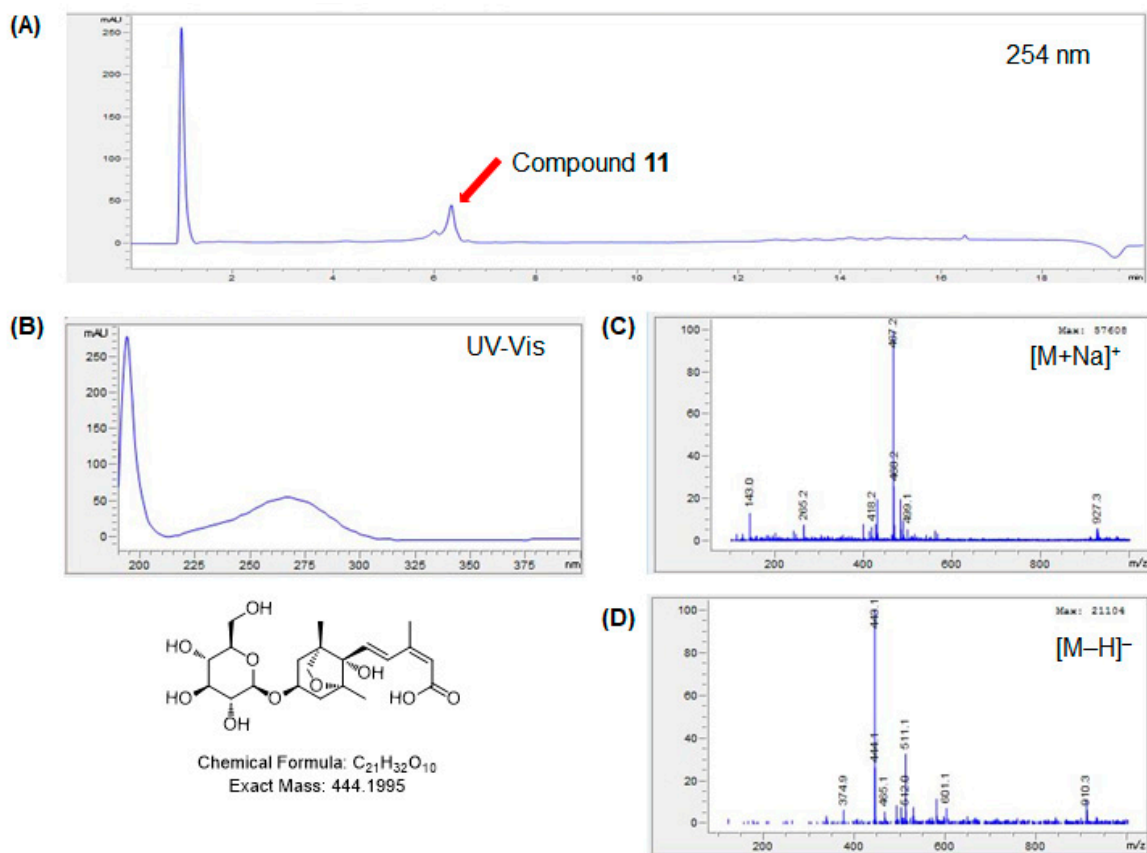

**Figure S22.** UV chromatogram of LC/MS (A: monitored at 254 nm) and UV (B) and MS data (C: positive; D: negative) for **11**.

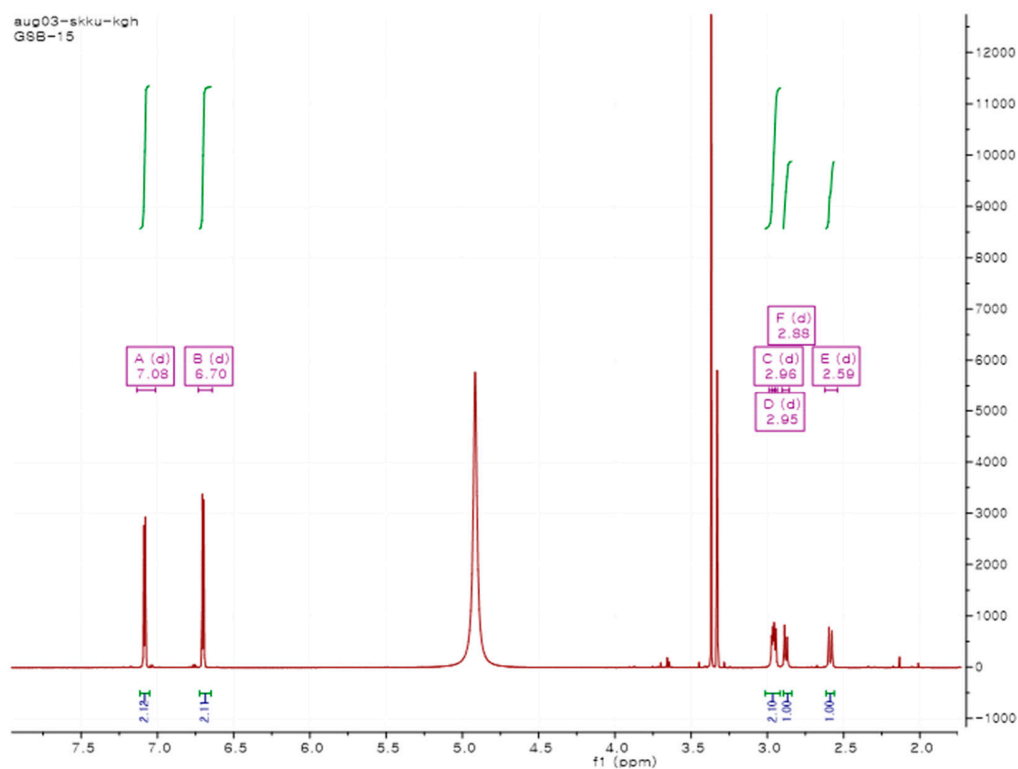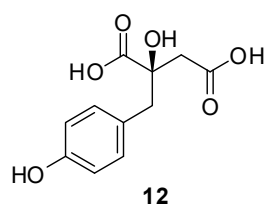

**Figure S23.**  $^1\text{H}$ -NMR ( $\text{CD}_3\text{OD}$ , 850 MHz) spectrum of eucomic acid (**12**).

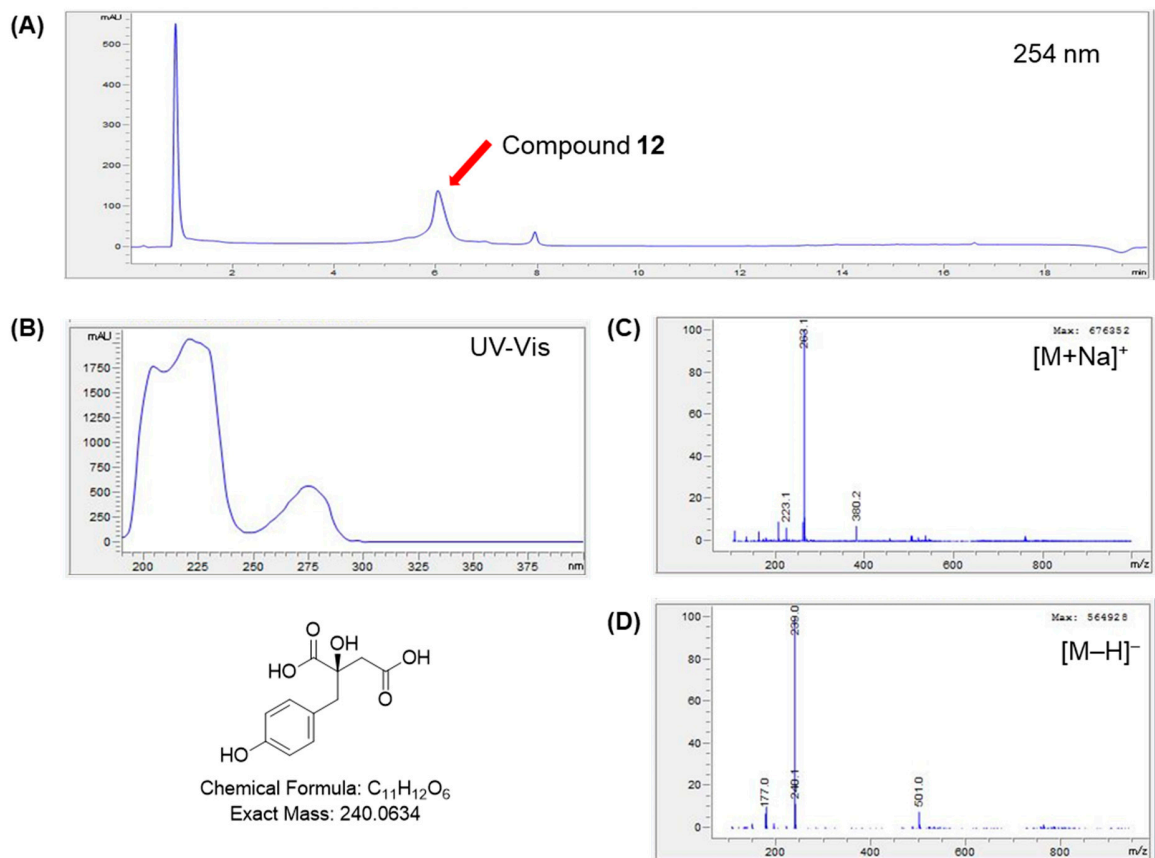

**Figure S24.** UV chromatogram of LC/MS (A: monitored at 254 nm) and UV (B) and MS data (C: positive; D: negative) for **12**.

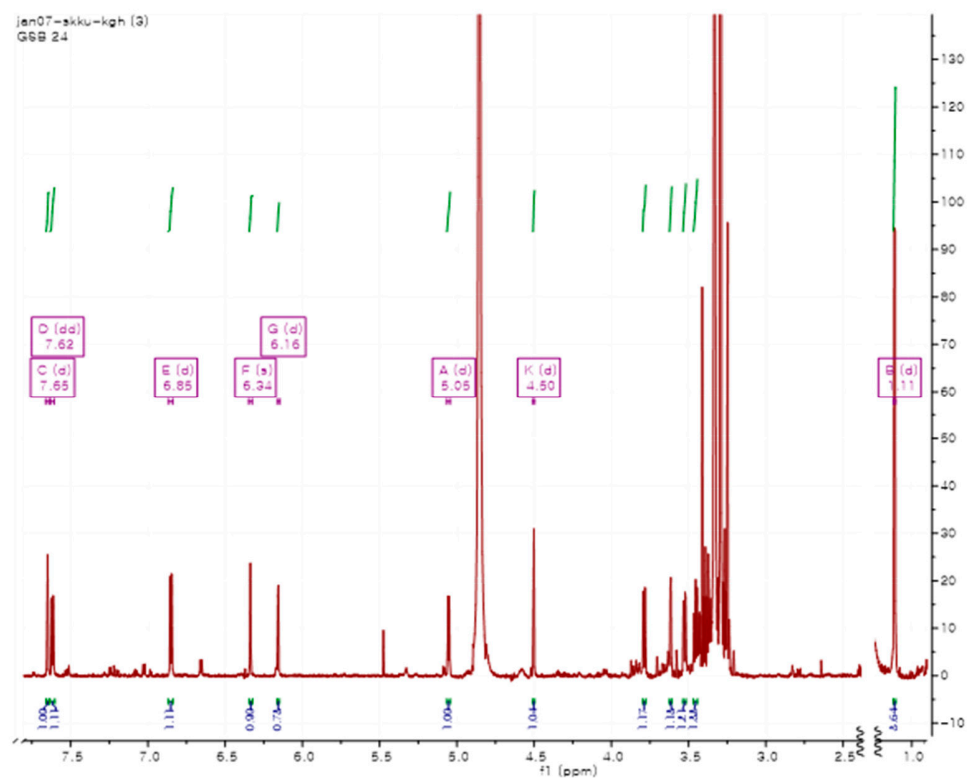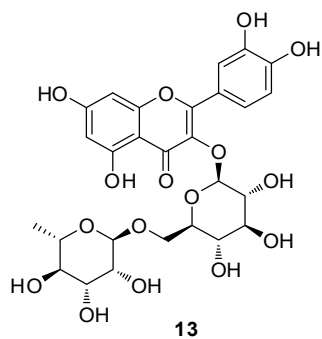

**Figure S25.**  $^1\text{H}$ -NMR ( $\text{CD}_3\text{OD}$ , 850 MHz) spectrum of rutin (**13**).

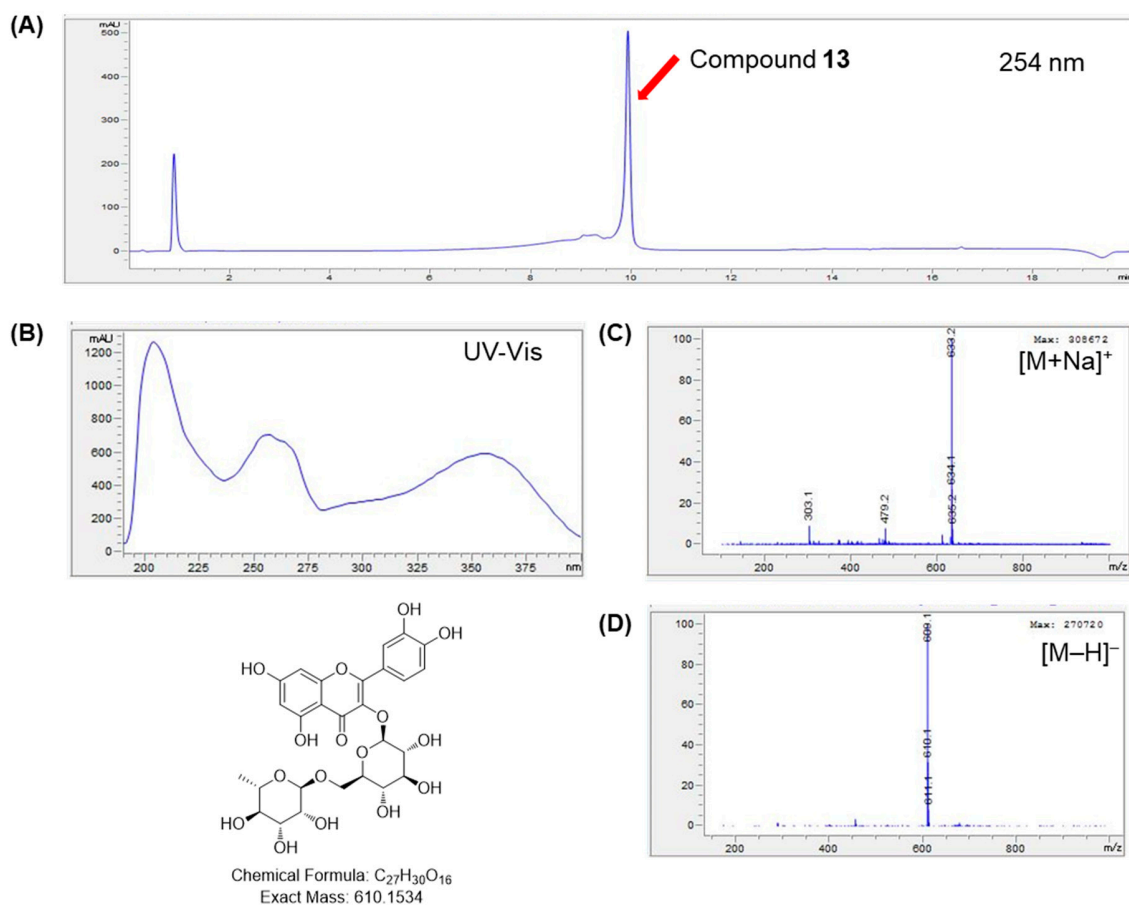

**Figure S26.** UV chromatogram of LC/MS (A: monitored at 254 nm) and UV (B) and MS data (C: positive; D: negative) for **13**.

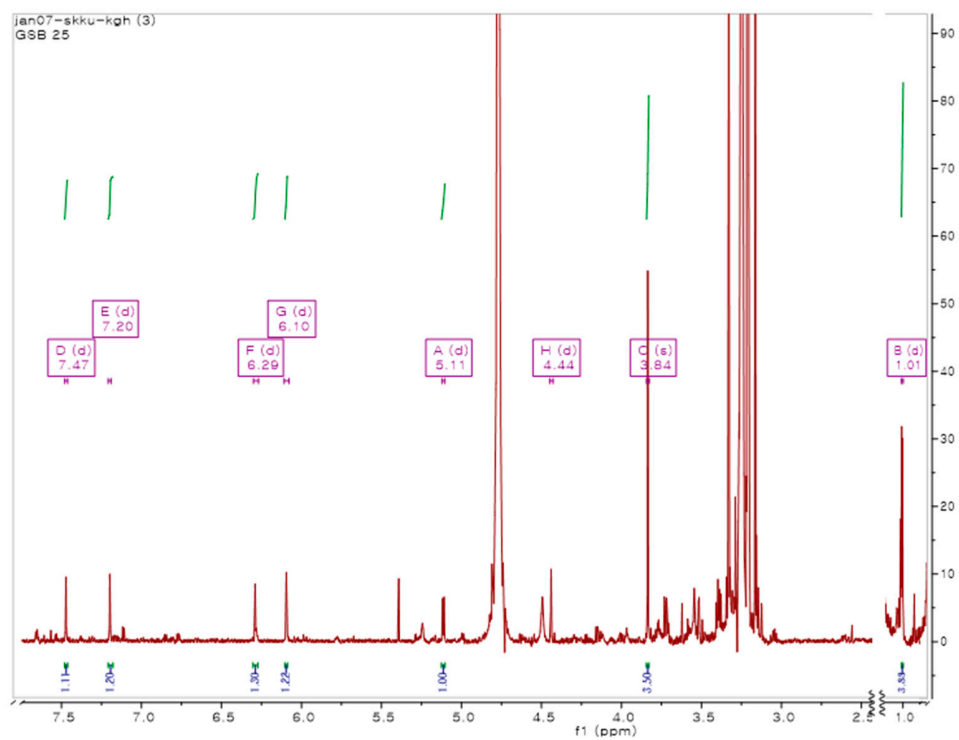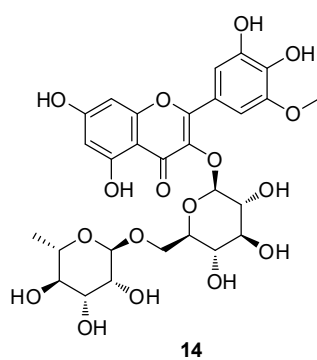

**Figure S27.**  $^1\text{H}$ -NMR ( $\text{CD}_3\text{OD}$ , 850 MHz) spectrum of laricitrin 3-rutinoside (**14**).

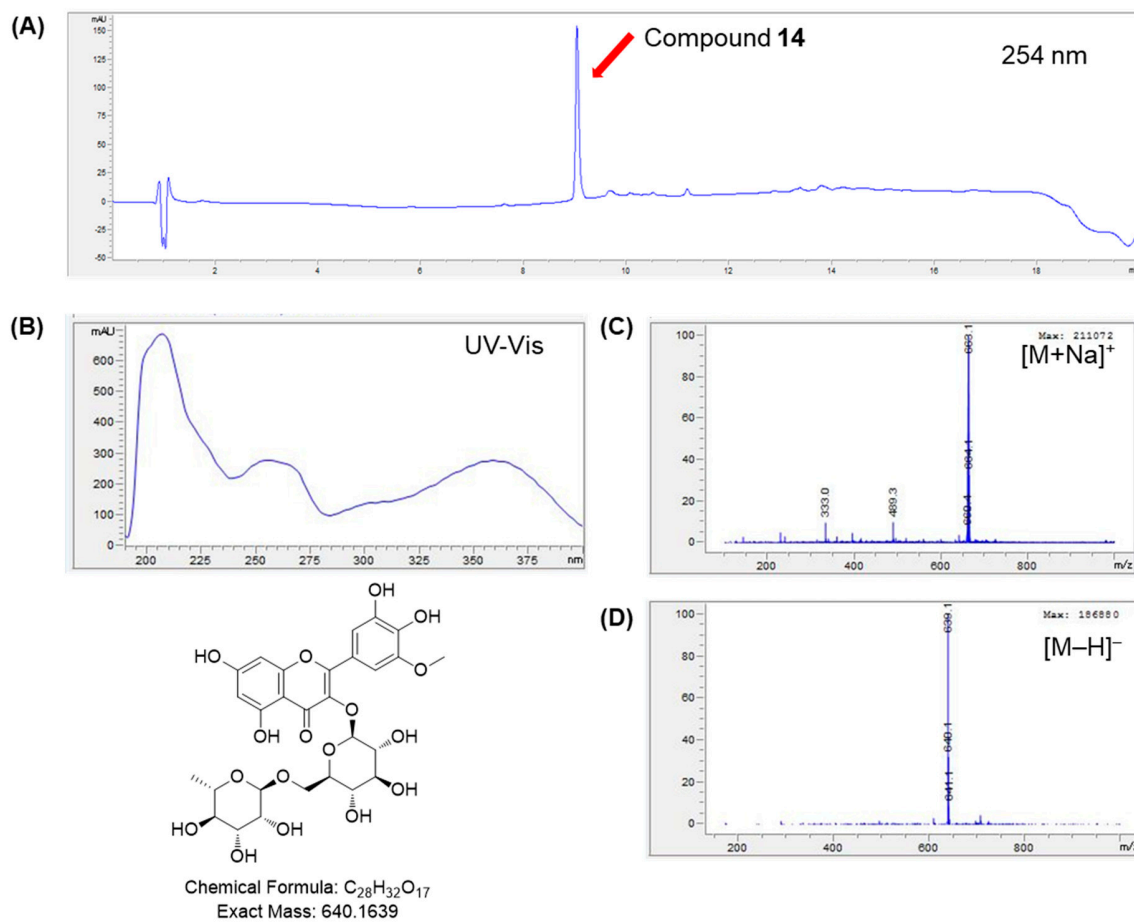

**Figure S28.** UV chromatogram of LC/MS (A: monitored at 254 nm) and UV (B) and MS data (C: positive; D: negative) for **14**.

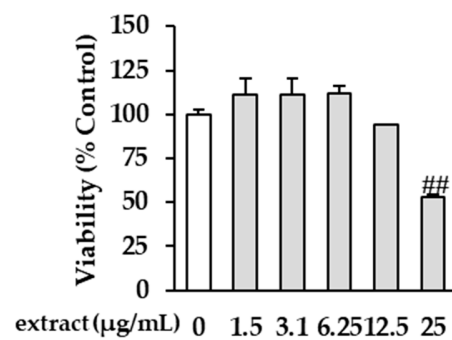

**Figure S29.** Effect of the extract on NHDF viability. Data are presented as mean  $\pm$  SEM ( $n = 2$ ). <sup>##</sup>  $p < 0.01$  compared with the control group.



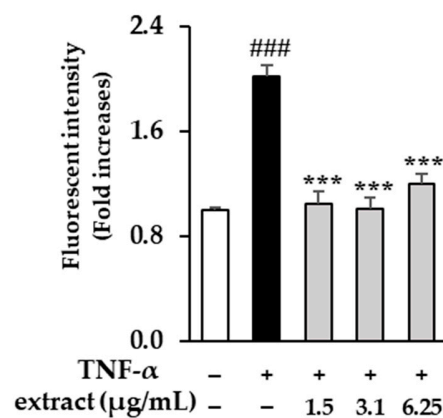

**Figure S30.** Effects of the extract on TNF- $\alpha$ -induced intercellular reactive oxygen species (ROS) generation. Data are presented as the mean  $\pm$  SEM (n = 3). ### p < 0.001 compared to the control group; \*\*\* p < 0.001 compared to the TNF- $\alpha$ -treated group.

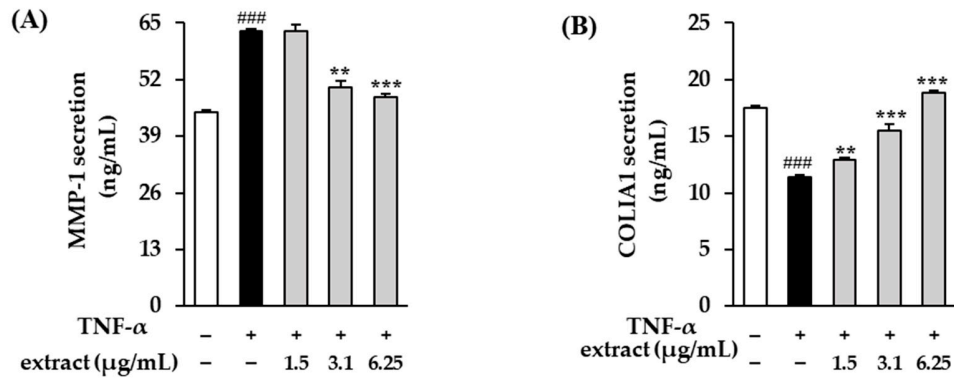

**Figure S31.** Effect of the extract on MMP-1 and COLIA1 protein expression in tumor necrosis factor- $\alpha$  (TNF- $\alpha$ )-stimulated normal human dermal fibroblasts (NHDFs). Data are presented as the mean  $\pm$  SEM (n = 3). ### p < 0.001 compared to the control group; \*\* p < 0.01, and \*\*\* p < 0.001, compared to the TNF- $\alpha$ -treated group.
